# Supplementary material for: Global prevalence and incidence of hallux valgus: a systematic review and meta-analysis
Source: J Foot Ankle Res. 2023 Sep 20;16:63. doi: 10.1186/s13047-023-00661-9 (PMC10510234; doi:10.1186/s13047-023-00661-9)
Supplement: Supplementary file 1 — Additional file 1: eFigure 1. Forest Plot of the Prevalence of HV by Afria. eFigure 2. Forest Plot of the Prevalence of HV by Asia. eFigure 3. Forest Plot of the Prevalence of HV by Europe. eFigure 4. Forest Plot of the Prevalence of HV by North America. eFigure 5. Forest Plot of the Prevalence of HV by Oceania. eFigure 6. Forest Plot of the Prevalence of HV by male. eFigure 7. Forest Plot of the Prevalence of HV by female. eFigure 8. Forest Plot of the Prevalence of HV by 0-20years. eFigure 9. Forest Plot of the Prevalence of HV by 21-60year. eFigure 10. Forest Plot of the Prevalence of HV by 61 year older. eFigure 11. Egger test. eTable 1. Quality assessment. Appendix 1. Search Strategy. [file 13047_2023_661_MOESM1_ESM.zip]

Archive with 13 entries (13 files):
- 13047_661_Supplementary Materials and Appendix/Appendix 1 Search Strategy.docx
- 13047_661_Supplementary Materials and Appendix/eFigure 1  Prevalence of HV by Afria.jpeg
- 13047_661_Supplementary Materials and Appendix/eFigure 3  Prevalence of HV by Europe.jpeg
- 13047_661_Supplementary Materials and Appendix/eFigure 4  Prevalence of HV by North America.jpeg
- 13047_661_Supplementary Materials and Appendix/eFigure10 Prevalence of HV by 61year older.jpeg
- 13047_661_Supplementary Materials and Appendix/eFigure11 Egger test.png
- 13047_661_Supplementary Materials and Appendix/eFigure2  Prevalence of HV by Asia.jpeg
- 13047_661_Supplementary Materials and Appendix/eFigure5   Prevalence of HV by Oceania.jpeg
- 13047_661_Supplementary Materials and Appendix/efigure6 Prevalence of HV by male.jpeg
- 13047_661_Supplementary Materials and Appendix/efigure7 Prevalence of HV by female.jpeg
- 13047_661_Supplementary Materials and Appendix/eFigure8 Prevalence of HV by 0 - 20years.jpeg
- 13047_661_Supplementary Materials and Appendix/eFigure9  Forest Plot of the Prevalence of HV by 21-60year.jpeg
- 13047_661_Supplementary Materials and Appendix/eTable 1 Quality assessment.xlsx
