# Supplementary material for: Global prevalence and incidence of hallux valgus: a systematic review and meta-analysis
Source: J Foot Ankle Res. 2023 Sep 20;16:63. doi: 10.1186/s13047-023-00661-9 (PMC10510234; doi:10.1186/s13047-023-00661-9)
Supplement: Supplementary file 1 — Additional file 1: eFigure 1. Forest Plot of the Prevalence of HV by Afria. eFigure 2. Forest Plot of the Prevalence of HV by Asia. eFigure 3. Forest Plot of the Prevalence of HV by Europe. eFigure 4. Forest Plot of the Prevalence of HV by North America. eFigure 5. Forest Plot of the Prevalence of HV by Oceania. eFigure 6. Forest Plot of the Prevalence of HV by male. eFigure 7. Forest Plot of the Prevalence of HV by female. eFigure 8. Forest Plot of the Prevalence of HV by 0-20years. eFigure 9. Forest Plot of the Prevalence of HV by 21-60year. eFigure 10. Forest Plot of the Prevalence of HV by 61 year older. eFigure 11. Egger test. eTable 1. Quality assessment. Appendix 1. Search Strategy. [file 13047_2023_661_MOESM1_ESM.zip › 13047_661_Supplementary Materials and Appendix/eTable 1 Quality assessment.xlsx]

## Sheet: eTable 1. Quality assessment
Global Prevalence and Incidence of Hallux Valgus: A Systematic Review and Meta-analysis Yang-Ting Cai, Yu-Ke Song, Min-Cong He, Wei He, Xian-Xin Zhong, Hao Wen*, Qiu-Shi Wei* * Address correspondence to: Qiu-Shi Wei, MD, PhD, Hao Wen , MD, PhD. Guangdong research institute for Orthopedics & Traumatology of Chinese Medicine, NO.261, Longxi Road, Liwan District, Guangzhou 510378, P. R. China. Corre…
eTable 1. Quality assessment
Author	Q1	Q2	Q3	Q4	Q5	Q6	Q7	Q8	Q9	Total(%)	Risk of Bias
XU XJ	Y	Y	N	Y	N	Y	Y	Y	Y	0.7778	LOW
Wu HT	Y	Y	Y	Y	Y	Y	Y	Y	Y	1	LOW
Sayli U	Y	Y	Y	Y	Y	Y	Y	Y	Y	1	LOW
Akinobu N	N	Y	Y	Y	N	Y	Y	Y	Y	0.7778	LOW
Nathaniel G	Y	Y	Y	Y	Y	Y	Y	Y	N	0.8889	LOW
Cui B	Y	Y	Y	Y	Y	Y	Y	Y	Y	1	LOW
Dunn JE	Y	Y	Y	Y	N	Y	Y	Y	N	0.7778	LOW
Maclennan R	Y	Y	Y	Y	U	Y	Y	U	Y	0.7778	LOW
Hylton B	Y	Y	N	N	N	Y	Y	Y	Y	0.6667	MODERATE
Pita Fernandez S	Y	Y	Y	Y	Y	Y	Y	Y	Y	1	LOW
David W	N	N	Y	Y	N	Y	Y	Y	Y	0.6667	MODERATE
Gonzalez-Martin C	Y	Y	Y	Y	Y	Y	Y	Y	Y	1	LOW
Scott G	Y	U	N	N	N	Y	Y	Y	Y	0.5556	MODERATE
Hong K	N	N	N	Y	N	Y	Y	Y	Y	0.5556	MODERATE
Matsumoto T	Y	Y	Y	N	Y	Y	Y	Y	Y	0.8889	LOW
Cobos-Moreno P	Y	Y	N	N	N	Y	Y	Y	Y	0.6667	MODERATE
Menz HB	Y	Y	Y	N	N	Y	Y	Y	Y	0.7778	LOW
Dittmar JM	Y	Y	N	N	N	Y	Y	Y	Y	0.6667	MODERATE
Bafor A	N	Y	Y	Y	Y	Y	Y	Y	Y	0.8889	LOW
Yuan YF	Y	Y	Y	N	N	Y	Y	Y	Y	0.7778	LOW
Puszczalowska-Lizis E	N	Y	N	Y	Y	Y	Y	Y	N	0.6667	MODERATE
Montiel V	Y	Y	Y	N	N	Y	Y	Y	Y	0.7778	LOW
Soemarko DS	Y	Y	Y	N	N	Y	Y	Y	Y	0.7778	LOW
Hendry GJ	Y	Y	Y	N	N	Y	Y	Y	N	0.6667	MODERATE
Huang ZG	Y	Y	Y	N	N	Y	Y	Y	Y	0.7778	LOW
Dufour AB	Y	Y	Y	N	N	Y	Y	Y	Y	0.7778	LOW
Mumido	Y	Y	Y	Y	Y	Y	Y	N	Y	0.8889	LOW
Zhang YZ	N	Y	Y	N	N	Y	Y	Y	Y	0.6667	MODERATE
Shine LB	Y	Y	Y	N	Y	Y	Y	N	N	0.6667	MODERATE
Roddy E	Y	Y	Y	N	Y	Y	N	Y	N	0.6667	MODERATE
Spahn G	Y	Y	Y	N	Y	Y	Y	Y	Y	0.8889	MODERATE
Menz HB	Y	Y	Y	N	N	Y	Y	Y	U	0.6667	MODERATE
Menz HB	Y	Y	Y	Y	N	Y	Y	N	U	0.6667	MODERATE
Cho NH	Y	Y	Y	N	N	Y	Y	Y	N	0.6667	MODERATE
Mafart B	Y	Y	N	N	Y	Y	Y	Y	N	0.6667	MODERATE
Jerosch J	N	Y	N	Y	Y	Y	Y	Y	U	0.6667	MODERATE
Okuda H	Y	Y	Y	N	Y	Y	Y	Y	Y	0.8889	LOW
Menz HB	Y	Y	Y	N	Y	U	Y	Y	Y	0.7778	LOW
Krul M	Y	Y	Y	N	Y	Y	Y	Y	Y	0.8889	LOW
Menz HB	Y	Y	Y	N	Y	Y	Y	N	Y	0.7778	LOW
Enwemeka CS	Y	Y	Y	N	Y	U	Y	N	Y	0.6667	MODERATE
Chou LW	Y	Y	Y	N	Y	Y	Y	Y	Y	0.8889	LOW
Owoeye BA	Y	Y	Y	Y	Y	Y	Y	Y	Y	1	LOW
Shibuya N	Y	Y	Y	N	N	Y	Y	Y	Y	0.7778	LOW
Legend: Y=Yes; N=No; U=Unclear; NA=Not applicable
Q1: Was the sample frame appropriate to address the target population? Q2: Were study participants sampled in an appropriate way?Q3: Was the sample size adequate? Q4: Were the study subjects and the setting described in detail? Q5: Was the data analysis conducted with sufficient coverage of the identified sample? Q6: Were valid methods used for the identification of the condition? Q7: Was the con…
